# Supplementary material
Source: Springer Nature journal article supplement (http://publikationen.ub.uni-frankfurt.de/opus4/files/868/12860_2007_21_MOESM5_ESM.pdf)

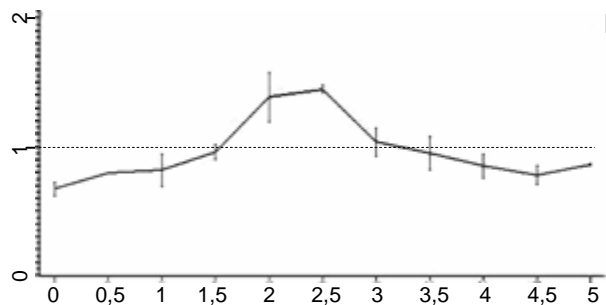

No. 11

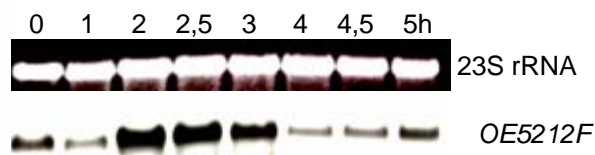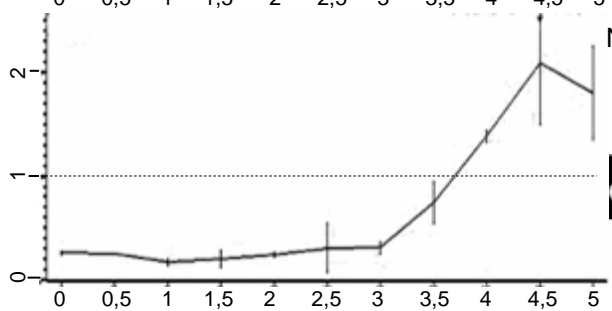

No. 58

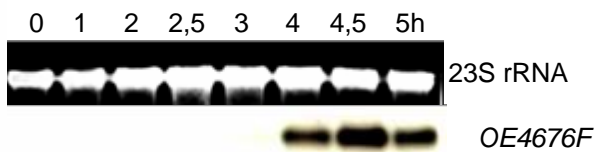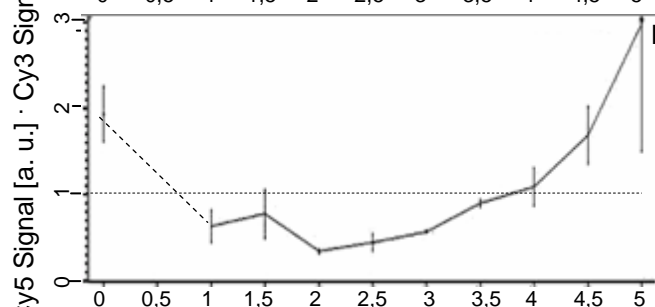

No. 61

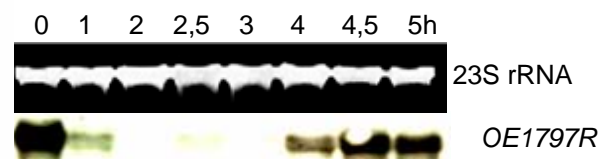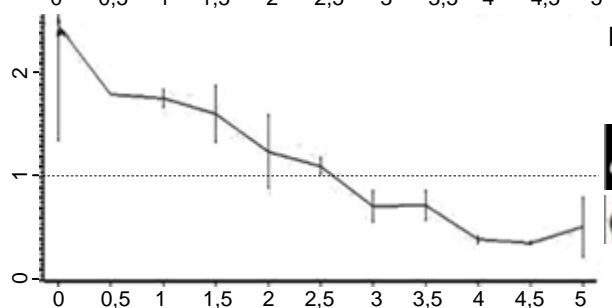

No. 66

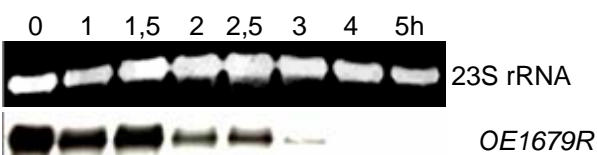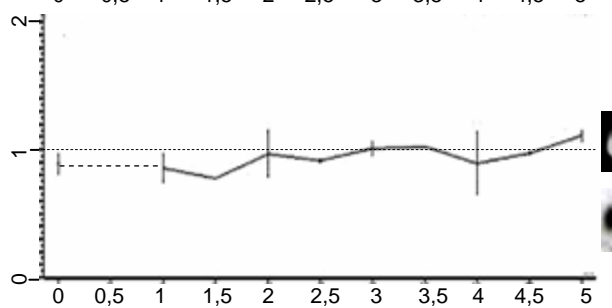

unregulated

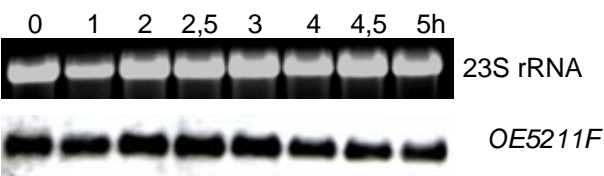

t [h]

Supplement: MOESM5 [file 12860_2007_21_MOESM5_ESM.pdf]
